# Supplementary material for: Fluctuations of continuous soil moisture evaporation under different rainfall conditions during the growing period of the non-monsoon season, the eastern Loess Plateau
Source: PeerJ journal article supplement (doi:10.7717/peerj.18514), 2024-11-22
Supplement: Raw_Data.Zip [file open data.xls]

## Sheet: Sheet1
Types	Time	Depth	Samples	δ18O (‰)				δ2H (‰)			Types	Precipitation			δ18O (‰)	δ2H
		(cm)	number	Max.	Min.	Mean		Max.	Min.	Mean		Period	events	(mm)		(‰)
	2023.4.1–2023.4.30	0-20	30	-2.16	-6.65	-4.78	-38.57		-52.72	-46.33		P1	2023.4.3	21	-6.84	-40.98
		20-40	30	-3.79	-7.07	-5.39	-41.48		-56.62	-51.01			2023.4.4	19	-15.6	-104.96
		40-60	30	-3.93	-8.35	-5.77	-46.98		-58.65	-52.12		P2	2023.4.12	0.2	5.71	30.81
		60-80	30	-3.93	-8.23	-5.53	-45.45		-59.63	-51.62		P3	2023.4.21	17.3	-5.76	-24.6
		80-100	30	-3.35	-7.91	-5.69	-43.51		-61.04	-53.96			2023.4.23	10.72	-5.16	-23.88
soil moisture	2023.5.1–2023.5.30	0-20	31	-4.24	-12.59	-6.86	-16.11		-60.48	-41.62	Precipitation	P4	2023.4.27	2.4	-8.9	-62.19
		20-40	31	-3.74	-12.01	-8.1	-21		-61.97	-45.82		P5	2023.5.3	1.78	0.86	14.16
		40-60	31	-4.67	-12.43	-8.85	-36.13		-59.83	-47.18		P6	2023.5.6	22.5	-4.74	-22.68
		60-80	31	-4.11	-12.54	-8.37	-33.37		-58.83	-46.12		P7	2023.5.27	6.7	-6.92	25.35
		80-100	31	-4	-11.98	-8.74	-30.04		-61.49	-46.04			2023.5.28	9.7	-5.16	-23.88
	2023.6.1–2023.6.30	0-20	30	-0.13	-8.67	-4.93	-20.47		-71	-38.18			2023.5.30	8.7	-4.15	-18.49
		20-40	30	-4.22	-11.1	-7.66	-26.34		-62.86	-47.91			2023.5.31	6.5	-3.47	-15.35
		40-60	30	-3.63	-11.03	-8	-42.66		-68.1	-55.43		P8	2023.6.11	0.3	-0.03	-15.69
		60-80	30	-4.22	-11.1	-7.73	-26.34		-62.86	-48.34		P9	2023.6.18	4.3	-4.69	-35.82
		80-100	30	-3.76	-9.62	-6.81	-48.22		-68.15	-56.02		P10	2023.6.26	5.3	-0.63	-14.77
													2023.6.28	24.7	-9.02	-17.18
